# Supplementary material
Source: PubMed Central journal article supplement (PMC3477228)
Supplement: supp_mol.112.080424_CorrectedSupple_InforevALL.pdf [file supp_mol.112.080424_CorrectedSupple_InforevALL.pdf]

Title: *In silico* and intuitive predictions of CYP46A1 inhibition by marketed drugs with subsequent enzyme crystallization in complex with fluvoxamine

Authors: Natalia Mast, Marlin Linger, Matthew Clark, Jeffrey Wiseman, C. David Stout and Irina A. Pikuleva

Journal: Molecular Pharmacology

### **Supplemental Figure Legends**

Supplemental Figure 1. Unbiased  $\sigma_A$  weighted  $2|F_o|-|F_c|$  electron density for the FLV complex of CYP46A1 at 2.5 Å resolution contoured from  $1\sigma$  to  $5\sigma$  in intervals of  $1\sigma$ . The primary amine of fluvoxamine (carbon atoms white, oxygen red, nitrogen blue, fluorine purple) is bonded to Fe of the heme.

Supplemental Figure 2. Photoisomerization of FLV in solution upon irradiation with UV light. Stock solution of FLV in water (5 mM) was left for 2 hrs at a 20 cm-distance from the UVC lamp (Philips TUV 30W T8 G30T8). The brown and gray traces show the spectrum of FLV solution before and after irradiation, respectively. These spectra are similar to those of the E and Z isomers in Miolo et al., 2002, Eur. J. Pharm.

### **Supplemental Table Legends**

Supplemental Table 1. Crystallographic statistics for the FLV-CYP46A1 complex.

Supplemental Table 2. A summary of computational and intuitive predictions. The color code is the same as in Fig. 1.

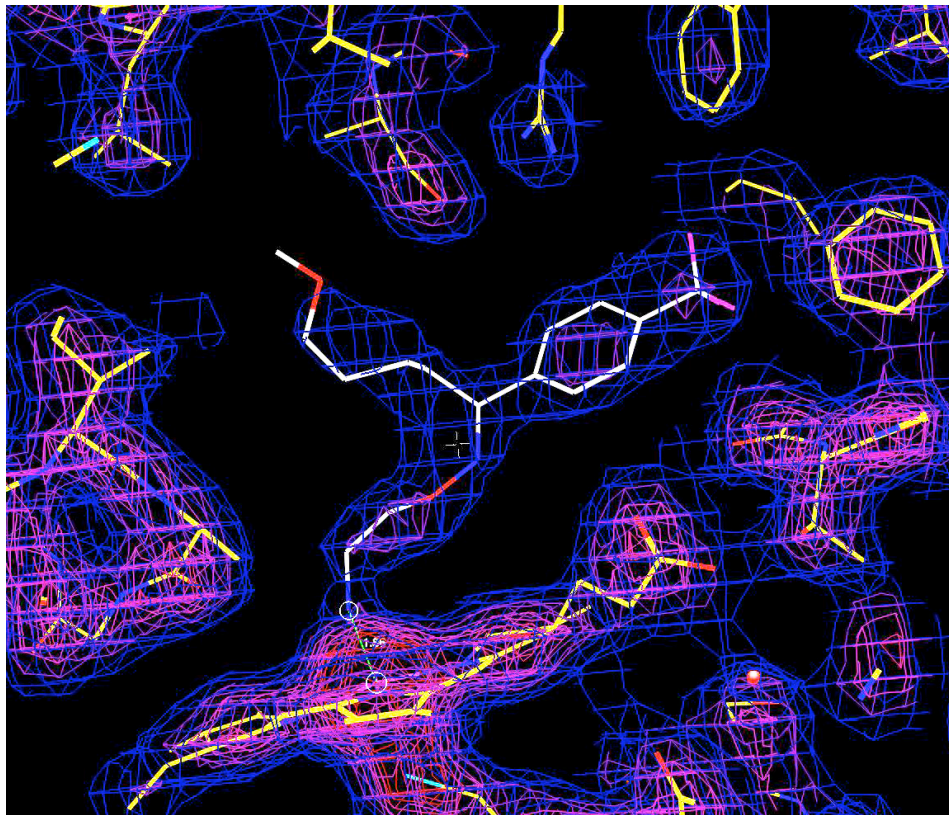

**Supplemental Figure 1.** Unbiased  $\sigma_A$  weighted  $2|F_o|-|F_c|$  electron density for the FLV complex of CYP46A1 at 2.5 Å resolution contoured from  $1\sigma$  to  $5\sigma$  in intervals of  $1\sigma$ . The primary amine of fluvoxamine (carbon atoms white, oxygen red, nitrogen blue, fluorine purple) is bonded to Fe of the heme.

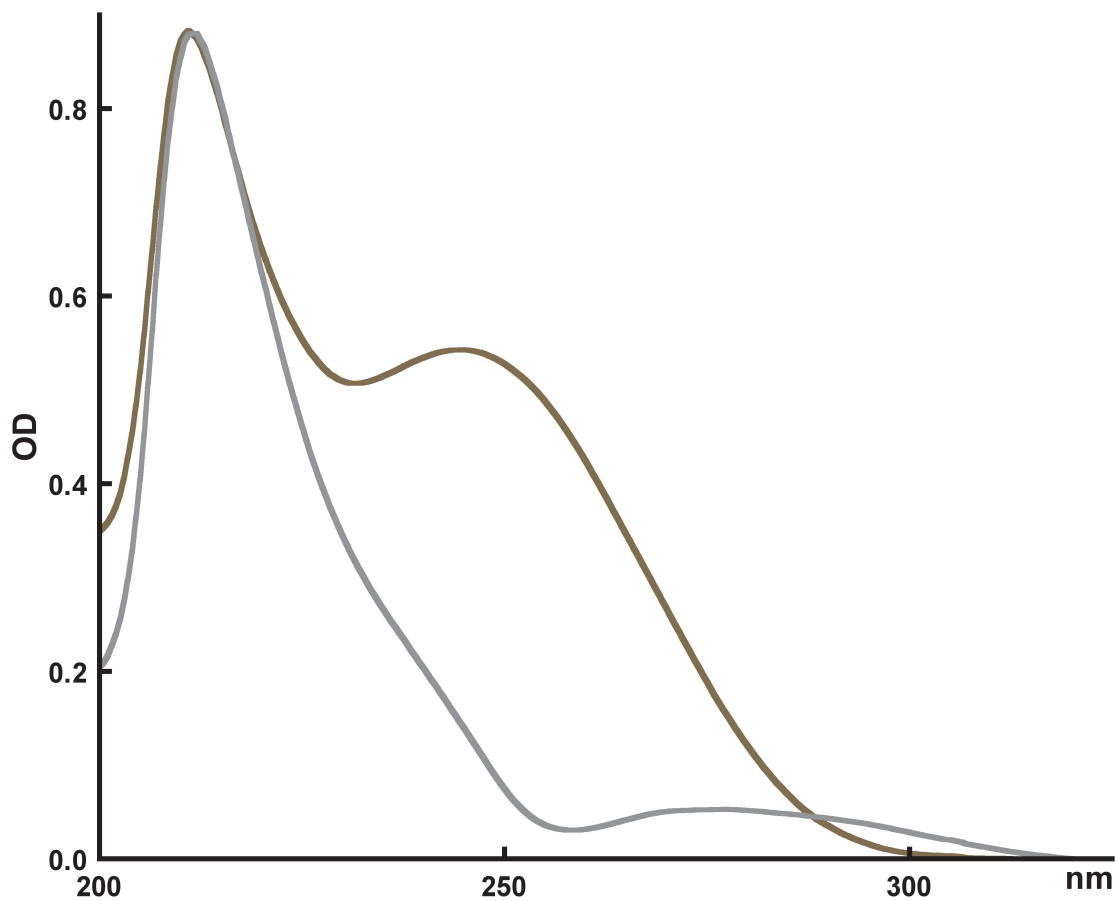

**Supplemental Figure 2.** Photoisomerization of FLV in solution upon irradiation with UV light. Stock solution of FLV in water (5 mM) was left for 2 hrs at a 20 cm-distance from the UVC lamp (Philips TUV 30W T8 G30T8). The brown and gray traces show the spectrum of FLV solution before and after irradiation, respectively. These spectra are similar to those of the E and Z isomers in Miolo et al., 2002, Eur. J. Pharm.

### Supplemental Table 1

Crystallographic statistics for the FLV-CYP46A1 complex

| <b>CYP46A1 complex</b>                 | <b>Fluvoxamine</b>                  |
|----------------------------------------|-------------------------------------|
| PDB code                               | 4ENH                                |
| Space group                            | I4 <sub>1</sub> 22                  |
| Unit cell dimensions (Å)               | 121.1 121.1 141.9                   |
| Molecules per asymmetric unit          | 1                                   |
| Solvent content                        | 50.7%                               |
| <b>Data</b>                            |                                     |
| Total observations > 0 $\sigma_F$      | 131,207                             |
| Unique reflections > 0 $\sigma_F$      | 18,625                              |
| Redundancy                             | 7.0                                 |
| Completeness                           | 100.0%                              |
| Resolution (last shell) (Å)            | 2.64 – 2.50                         |
| <I/ $\sigma_I$ > all data (last shell) | 6.2 (1.3)                           |
| Rmerge all data (last shell)           | 0.101 (0.600)                       |
| <b>Refinement</b>                      |                                     |
| R-factor                               | 0.210                               |
| Rfree                                  | 0.272                               |
| Reflections used                       | 17,630                              |
| Test set                               | 950 (5.1%)                          |
| RMSD from ideality                     |                                     |
| Bond lengths (Å)                       | 0.010                               |
| Bond angles (deg.)                     | 1.19                                |
| Ramachandran plot                      |                                     |
| Favored regions                        | 96.7%                               |
| Allowed regions                        | 99.3%                               |
| <b>Model</b>                           |                                     |
|                                        | Residues / Avg. B (Å <sup>2</sup> ) |
| Protein                                | 426 (44.2)                          |
| Heme                                   | 1 (25.8)                            |
| FLV                                    | 1 (77.2)                            |
| H <sub>2</sub> O molecules             | 132 (53.2)                          |

**Supplemental Table 2.** A summary of computational and intuitive predictions.  
The color code is the same as in Fig. 1.

| Drug generic name    | Residual CYP46A1 activity, % | Round of <i>in-silico</i> screening |                      | Intuitive predictions |
|----------------------|------------------------------|-------------------------------------|----------------------|-----------------------|
|                      |                              | Round 1, free energy                | Round 2, free energy |                       |
| acebutolol           | 99±2                         |                                     |                      | +                     |
| acenocoumarol        | 89±4                         |                                     |                      | +                     |
| acepromazine         | 108±3                        | -18.31                              |                      |                       |
| acetaminophen        | 132±3                        | -17.97                              | -34.1915             |                       |
| acetazolamide        | 100±3                        | -51.93                              |                      |                       |
| acetoexamide         | 97±3                         |                                     |                      | +                     |
| acetylsalicylic acid | 79±2                         | -22.39                              |                      |                       |
| agomelatine          | 110±3                        |                                     |                      | +                     |
| albaconazole         | 34±7                         |                                     |                      | +                     |
| alendronate          | 99±1                         | -51.4                               |                      |                       |
| alosetron            | 113±3                        | -19.33                              |                      |                       |
| altretamine          | 83±2                         | -15.61                              |                      |                       |
| amiloride            | 90±9                         | -27.76                              | -57.3359             |                       |
| aminoglutethimide    | 98±3                         | -23.01                              | -41.7141             |                       |
| aminolevulinic acid  | 93±8                         | -18.79                              | -46.5299             |                       |
| amisulpride          | 101±5                        | -24.3                               |                      |                       |
| amitriptyline        | 99±3                         | -14.66                              |                      |                       |
| amoxapine            | 107±9                        | -22.97                              |                      |                       |
| amrinone             | 63±1                         |                                     |                      | +                     |
| anastrozole          | 97±2                         | -19.43                              |                      |                       |
| apraclonidine        | 95±3                         | -22.78                              |                      |                       |
| aprepitant           | 113±3                        |                                     |                      | +                     |
| aspartam             | 99±3                         |                                     |                      | +                     |
| atenolol             | 95±5                         | -20.19                              |                      |                       |
| atropine             | 100±3                        | -22.65                              |                      |                       |
| azacitidine          | 96±1                         | -30.54                              | -55.8407             |                       |
| azathioprine         | 53±1                         | -22.47                              | -36.9867             |                       |
| benoxinate           | 99±2                         |                                     |                      | +                     |
| benserazide          | 77±4                         | -32.43                              | -62.8826             |                       |
| benzocaine           | 93±8                         | -20.06                              | -47.0995             |                       |
| benzthiazide         | 100±5                        | -73.65                              |                      |                       |
| betaxolol            | 101±3                        |                                     |                      | +                     |
| bethanechol          | 91±7                         | -20.36                              | -39.6212             |                       |
| bicalutamide         | 35±4                         | -40.91                              |                      |                       |
| brimonidine          | 91±1                         | -21.65                              |                      |                       |
| brinzolamide         | 104±3                        | -60.81                              |                      |                       |
| bupropion            | 101±3                        | -19.51                              |                      |                       |
| cabergoline          | 86±3                         |                                     |                      |                       |
| caffeine             | 103±3                        | -17.51                              |                      |                       |
| candesartan          | 85±6                         | -32.82                              |                      |                       |
| captopril            | 95±6                         | -20.07                              |                      |                       |
| carbachol            | 91±1                         |                                     | -45.3308             |                       |
| carbenoxolone        | 52±1                         |                                     |                      | +                     |
| carbidopa            | 78±1                         | -26.14                              |                      |                       |
| carisoprodol         | 90±5                         | -20.69                              |                      |                       |
| cefoxitin            | 92±5                         | -35.95                              |                      |                       |

**Supplemental Table 2.** A summary of computational and intuitive predictions.  
The color code is the same as in Fig. 1.

|                        |        |        |           |   |
|------------------------|--------|--------|-----------|---|
| cidofovir              | 107±1  | -33.77 |           |   |
| cimetidine             | 8±2    | -21.64 | -28.9885  |   |
| ciprofloxacin          | 99±3   | -32.62 |           |   |
| citalopram             | 91±7   | -20.6  |           |   |
| clobazam               | 88±3   |        |           | + |
| clofibrate             | 109±3  | -26.52 |           |   |
| clonidine              | 80±2   | -17.13 |           |   |
| clotrimazole           | 16±1   | -19.89 |           |   |
| clozapine              | 96±3   | -22.87 |           |   |
| colistin               | 107±4  |        |           | + |
| cyclobenzaprine        | 111±3  | -16.09 |           |   |
| cycloserine            | 93±6   | -15.98 | -34.3689  |   |
| dacarbazine            | 82±5   | -22.77 |           |   |
| dapsone                | 89±6   | -36.6  |           |   |
| debrisoquine           | 90±3   |        |           | + |
| demeclocycline         | 103±1  | -44.49 |           |   |
| desipramine            | 104±4  | -14.33 |           |   |
| desloratadine          | 86±7   | -21.69 |           |   |
| desogestrel            | 101±3  | -15.24 |           |   |
| dexmedetomidine        | 8±2    | -14.66 | -30.097   |   |
| dextromethorphan       | 79±4   | -18.7  |           |   |
| dehydroepiandrosterone | 58±3   |        |           | + |
| diclofenac             | 84±4   | -22.69 |           |   |
| diflunisal             | 78±3   | -23.61 |           |   |
| dimenhydrinate         | 106±3  |        |           | + |
| disulfiram             | 84±4   | -16.07 |           |   |
| dopamine               | 83±2   | -24.7  | -40.3644  |   |
| dorzolamide            | 77±3   | -71.81 |           |   |
| droperidol             | 78±7   | -28.44 |           |   |
| droxidopa              | 61±2   |        |           | + |
| duloxetine             | 107±5  | -15.37 |           |   |
| edrophonium            | 85±3   | -15.6  |           |   |
| entacapone             | 84±6   | -23.26 |           |   |
| entecavir              | 102±7  | -28.8  |           |   |
| ephedrine              | 49±2   |        |           | + |
| epinastine             | 106±4  | -17.13 | -21.28    |   |
| epinephrine            | 25±1   | -22.26 | -47.8781  |   |
| equilenin              | 89±3   |        |           | + |
| ergonovine             | 110±1  |        |           | + |
| estradiol              | 32±2.4 | -20.31 |           |   |
| estrone                | 95±3   | -19.56 |           |   |
| estropipate            | 97±7   | -31.49 |           |   |
| ethinamate             | 107±6  | -20.64 | -48.578   |   |
| ethinyl estradiol      | 107±8  | -23.54 |           |   |
| ethotoin               | 98±3   | -19.77 |           |   |
| exemestane             | 85±4   | -17.64 |           |   |
| famotidine             | 60±3   | -41.07 | -115.6139 |   |
| felbamate              | 98±8   | -29.4  | -43.6726  |   |
| fenofibrate            | 104±3  |        |           | + |

**Supplemental Table 2.** A summary of computational and intuitive predictions.  
The color code is the same as in Fig. 1.

|                     |         |        |          |   |
|---------------------|---------|--------|----------|---|
| fluconazole         | 98±3    | -23.31 | -42.5044 |   |
| flucytosine         | 85±2    | -17.64 |          |   |
| fludrocortisone     | 106±3   | -30.85 |          |   |
| fluoxetine          | 105±4   | -19.36 |          |   |
| fluphenazine        | 109±4.0 |        |          | + |
| flurazepam          | 88±3    | -8.26  |          |   |
| flurbiprofen        | 97±5    | -24.68 |          |   |
| fluspirilene        | 107±6   |        |          | + |
| fluvoxamine         | 11±0.2  | -22.54 |          |   |
| folate              | 100±3   | -35.92 |          |   |
| furosemide          | 111±3   | -34.71 |          |   |
| gabapentin          | 100±8   | -18.67 |          |   |
| galantamine         | 115±1   | -25.35 |          |   |
| genistein           | 91±2    |        |          | + |
| glucosamine         | 92±3    | -27.03 |          |   |
| guanabenz           | 89±9    | -23.46 | -45.3602 |   |
| guanethidine        | 98±6    | -20.4  | -40.555  |   |
| guanfacine          | 98±5    | -24.79 | -52.3205 |   |
| hexaconazole        | 46±5    |        |          | + |
| histamine phosphate | 70±5    | -16.16 | -31.5727 |   |
| huperzine           | 113±4   |        |          | + |
| hydralazine         | 59±2    | -16.58 | -36.7232 |   |
| hydroxyurea         | 91±6    | -15.36 | -47.0012 |   |
| ibuprofen           | 93±3    | -19.38 |          |   |
| imexon              | 99±3    |        |          | + |
| irbesartan          | 89±8    | -30.63 |          |   |
| isocarboxazid       | 88±7    | -22.67 |          |   |
| isoniazid           | 88±9    | -15.9  | -38.4696 |   |
| isoproterenol       | 53±7    | -23.59 |          |   |
| itraconazole        | 55±1    |        |          | + |
| ketamine            | 110±3   | -18.03 |          |   |
| ketoconazole        | 55±1    |        |          | + |
| labetalol           | 105±9   | -22.24 |          |   |
| lacosamide          | 97±7    | -25.29 |          |   |
| lamivudine          | 94±5    | -25.72 | -52.0697 |   |
| lansoprazole        | 86±5    | -23.75 |          |   |
| latanoprost         | 60±2    |        |          | + |
| letrozole           | 97±3    | -21.49 | -33.2698 |   |
| levetiracetam       | 86±7    | -19.11 |          |   |
| levodopa            | 100±5   | -22.5  |          |   |
| levothyroxine       | 80±3    |        |          | + |
| linezolid           | 117±5   | -24.99 |          |   |
| mafenide            | 89±8    | -40.69 | -96.5939 |   |
| maprotiline         | 102±3   | -17.8  |          |   |
| mebendazole         | 105±3   | -22.24 |          |   |
| melphalan           | 107±3   | -26.09 |          |   |
| mepivacaine         | 56±2    | -17.48 |          |   |
| meprobamate         | 115±3   | -23.14 | -48.4217 |   |
| mesalamine          | 104±6   | -21.84 |          |   |

**Supplemental Table 2.** A summary of computational and intuitive predictions.  
The color code is the same as in Fig. 1.

|                 |        |        |          |   |
|-----------------|--------|--------|----------|---|
| mestranol       | 90±3   | -27.52 |          |   |
| metaraminol     | 89±2   | -21.88 |          |   |
| methamphetamine | 98±3   | -11.63 |          |   |
| methazolamide   | 100±6  | -38.19 |          |   |
| methocarbamol   | 106±1  | -25.09 | -43.2215 |   |
| methoxamine     | 109±5  | -20.98 |          |   |
| methyl dopa     | 92±1   | -26.78 |          |   |
| metipranolol    | 72±3   | -17.15 |          |   |
| metolazone      | 53±1   | -37.45 |          |   |
| metoprolol      | 96±4   |        |          | + |
| mexiletine      | 107±3  | -14.72 |          |   |
| mianserin       | 104±4  | -18.37 |          |   |
| midodrine       | 94±1   | -21.68 | -45.8917 |   |
| milnacipran     | 52±1   |        |          | + |
| minocycline     | 86±4   | -20.31 |          |   |
| minoxidil       | 90±4   | -23.94 | -37.4552 |   |
| mirtazapine     | 130±5  | -18.59 |          |   |
| mitomycin       | 41±1   | -32.97 |          |   |
| mizoribine      | 100±9  | -30.18 |          |   |
| moclobemide     | 94±2   |        |          | + |
| modafinil       | 89±2   | -30.88 | -44.9537 |   |
| molindone       | 99±2   |        |          | + |
| naproxen        | 102±5  | -21.36 |          |   |
| nelarabine      | 103±10 | -34.27 |          |   |
| nepafenac       | 92±4   | -25.57 | -30.446  |   |
| nicotinamide    | 92±6   |        |          | + |
| nifedipine      | 101±3  | -25.67 |          |   |
| nitrofurazone   | 74±4   | -23.73 | -53.4429 |   |
| nizatidine      | 40±5   | -17.75 |          |   |
| norepinephrine  | 83±3   | -23.02 |          |   |
| norgestimate    | 105±2  |        |          | + |
| olanzapine      | 100±3  | -17.48 |          |   |
| ondansetron     | 104±2  | -21.05 |          |   |
| orphenadrine    | 106±2  | -15.73 |          |   |
| oxazepam        | 106±3  | -25    |          |   |
| paroxetine      | 98±3   | -24.73 |          |   |
| pemirolast      | 112±1  | -21.63 | -51.7591 |   |
| pemoline        | 106±4  | -21.16 | -45.0975 |   |
| pentoxifylline  | 110±5  | -18.73 |          |   |
| pergolide       | 109±3  |        |          | + |
| phenacetamide   | 100±3  | -20.6  | -39.8843 |   |
| phenazopyridine | 99±2   | -20.18 | -37.2026 |   |
| phenformin      | 102±3  |        |          | + |
| phentolamine    | 98±4   | -19.59 |          |   |
| Phenylalanine   | 90±1   |        |          | + |
| Phenylephrine   | 87±3   | -20.53 |          |   |
| Phenytoin       | 84±5   | -22.81 |          |   |
| picrotoxin      | 62±3   |        |          | + |
| pilocarpine     | 79±2   | -18.11 | -29.6984 |   |



**Supplemental Table 2.** A summary of computational and intuitive predictions.  
The color code is the same as in Fig. 1.

|                      |       |        |          |   |
|----------------------|-------|--------|----------|---|
| pirenzepine          | 90±2  |        |          | + |
| posaconazole         | 13±1  |        |          | + |
| pramipexole          | 105±3 | -19.36 | -31.5771 |   |
| prazepam             | 71±6  | -23.6  |          |   |
| pregabalin           | 93±10 | -19.16 |          |   |
| primaquine           | 54±6  | -19.7  |          |   |
| procainamide         | 101±2 | -23.7  |          |   |
| procarbazine         | 88±2  | -20.03 |          |   |
| propericiazine       | 96±3  |        |          | + |
| propofol             | 105±3 | -20.81 |          |   |
| propranolol          | 106±3 | -18.04 |          |   |
| pseudoephedrine      | 113±3 | -17.44 |          |   |
| pyrazinamide         | 101±4 | -16.99 | -32.1946 |   |
| pyrimethamine        | 93±2  | -23.65 | -41.3082 |   |
| quinnestrol          | 70±3  | -23.2  |          |   |
| quinethazone         | 101±3 | -38.66 |          |   |
| quinidine            | 68±4  | -22.58 | -43.3095 |   |
| quinine              | 112±5 | -27.94 |          |   |
| ranitidine           | 9±2   | -23.34 |          |   |
| ravuconazole         | 50±2  |        |          | + |
| ribavirin            | 109±1 | -27.85 | -64.4542 |   |
| riluzole             | 106±5 | -19.77 |          |   |
| risedronate          | 101±1 | -42.68 |          |   |
| ritodrine            | 101±2 | -24.76 |          |   |
| rivastigmine         | 106±3 | -16.46 |          |   |
| rofecoxib            | 89±3  |        |          | + |
| rosiglitazone        | 93±5  | -27.98 |          |   |
| rufinamide           | 88±5  | -21.41 | -37.9069 |   |
| salicylate-sodium    | 92±2  |        |          |   |
| salsalate            | 112±3 |        |          | + |
| scopolamine          | 90±2  | -29.76 |          |   |
| selegiline           | 18±1  | -10.92 |          |   |
| sertindole           | 98±3  |        |          | + |
| sodium phenylacetate | 68±7  | -19.52 |          |   |
| d-sorbitol           | 106±5 | -30.37 |          |   |
| stanozolol           | 99±6  | -23.88 |          |   |
| sulfadoxine          | 98±9  | -41.47 |          |   |
| sulfamethazine       | 90±2  |        |          | + |
| sulfanilamide        | 75±2  | -38.05 | -81.2577 |   |
| sumatriptan          | 99±8  | -30.72 |          |   |
| suprofen             | 107±2 | -21.05 |          |   |
| tacrine              | 99±2  | -16.99 |          |   |
| tazobactam           | 114±1 | -45.07 | -88.9393 |   |
| telbivudine          | 93±2  | -26.42 | -55.0371 |   |
| temozolomide         | 89±8  | -21.86 | -40.6917 |   |
| terbutaline          | 80±2  | -21.08 |          |   |
| testosterone         | 49±4  | -15.41 |          |   |
| thiabendazole        | 95±2  | -13.91 |          |   |
| thiamylal            | 80±2  | -25.92 |          |   |

**Supplemental Table 2.** A summary of computational and intuitive predictions.  
The color code is the same as in Fig. 1.

|                             |       |        |          |   |
|-----------------------------|-------|--------|----------|---|
| ticlopidine                 | 117±2 | -15.32 |          |   |
| tiludronate                 | 99±1  | -52.62 |          |   |
| timolol                     | 96±1  | -18.93 |          |   |
| tinidazole                  | 83±2  | -35.09 |          |   |
| tizanidine                  | 117±2 | -19.88 |          |   |
| topiramate                  | 106±7 | -33.37 |          |   |
| tramadol                    | 98±2  | -20.17 |          |   |
| tranylcypromine             | 0     | -12.29 | -25.0257 |   |
| travoprost                  | 51±1  |        |          | + |
| triamterene                 | 94±3  | -23.53 |          |   |
| trihexyphenidyl             | 97±8  | -21.57 |          |   |
| trimetazidine hydrochloride | 93±7  | -19.19 |          |   |
| trimethoprim                | 112±2 | -26.43 |          |   |
| tripelennamine              | 101±2 | -15.74 |          |   |
| tropicamide                 | 59±1  | -22.81 |          |   |
| ttnpb                       | 104±7 |        |          | + |
| l-tyrosine                  | 80±3  | -23.3  |          |   |
| varenicline                 | 96±2  | -16.26 |          |   |
| voriconazole                | 12±3  | -23    | -16.0695 |   |
| vorinostat                  | 96±2  | -23.73 |          |   |
| zaleplon                    | 84±2  | -18.76 |          |   |
| zanamivir                   | 112±1 | -35.24 |          |   |
| zidovudine                  | 92±3  | -24.74 | -50.466  |   |
| zileuton                    | 107±5 | -20.41 | -40.2061 |   |
| zolmitriptan                | 97±2  | -22.21 |          |   |
| zonisamide                  | 93±1  | -37.17 |          |   |
